# Supplementary material
Source: Springer Nature journal article supplement (https://www.springermedizin.de/resource/supplementary/13058_2012_3010_MOESM4_ESM.pdf/9703072)

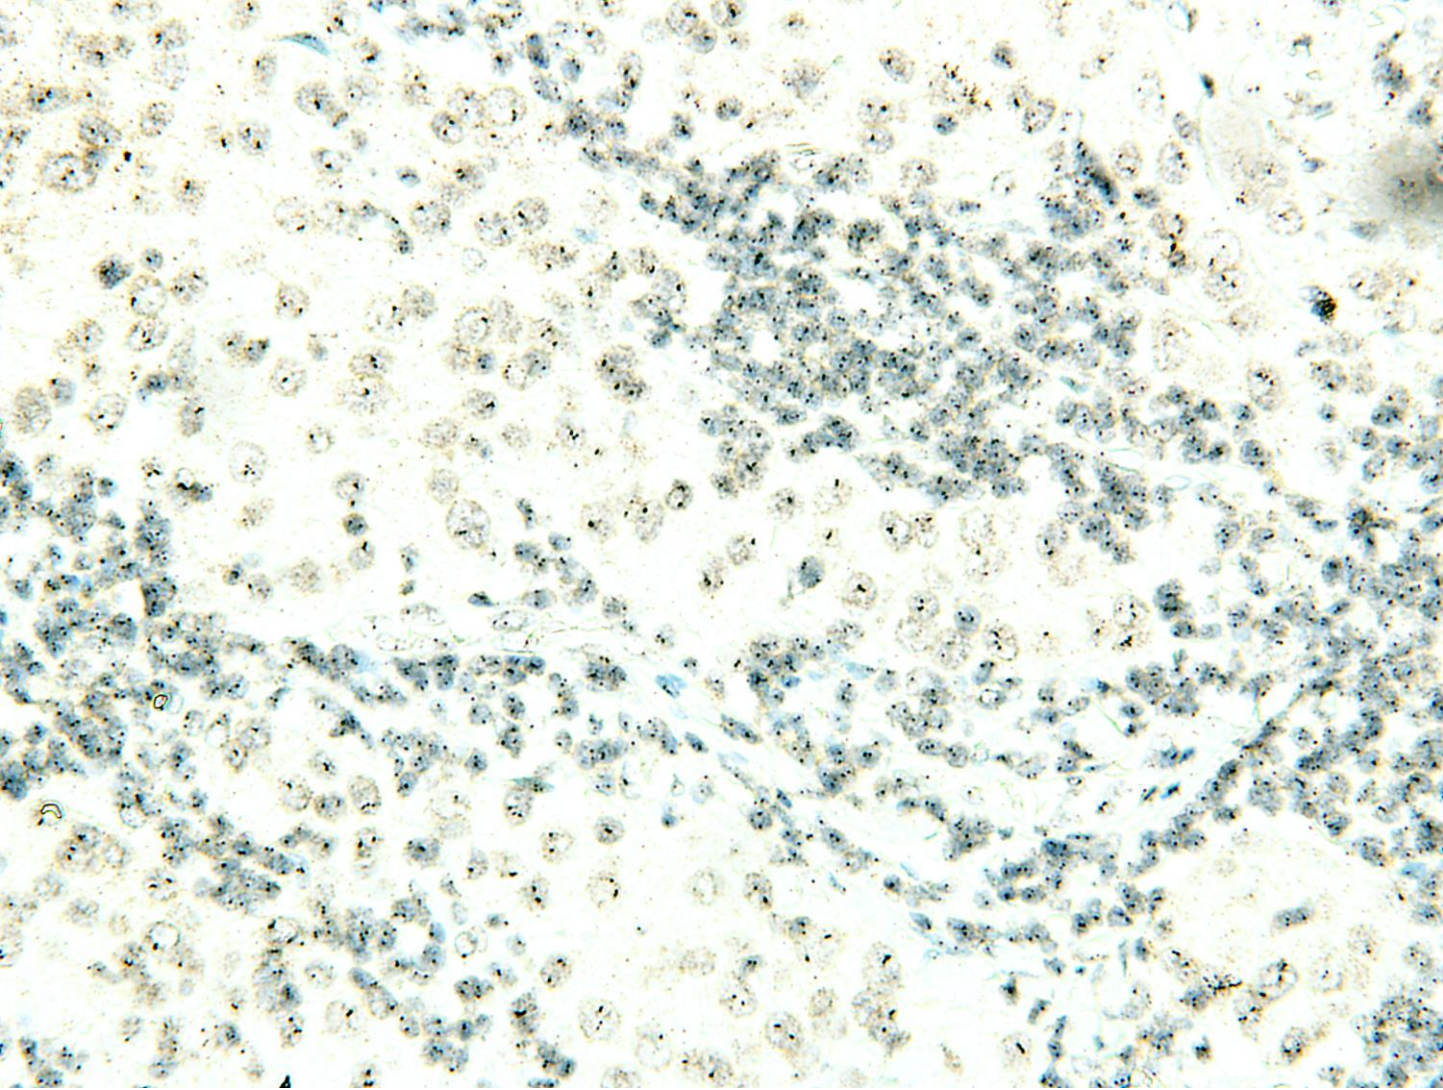

Supplement: MOESM4 [file 9703072]
